# Supplementary material
Source: publisher site journal article supplement (https://www.dovepress.com/article/480288)
Supplement: Supplementary file 1 [file get_supplementary_file.php]

ORIGINAL RESEARCH

Jiayan Huang et al

# An Injectable Hydrogel Bioimplant Loaded with Engineered Exosomes and Triple Anti-tuberculosis Drugs with Potential for Treating Bone and Joint Tuberculosis

Jiayan Huang1*

Han Li2*

Yuting Mei1

Pengcheng Yi 1

Yunyao Ren1

Yunjuan Wang3

Limei Han1

Qiusha Tang3

Dongfang Liu3

Wei Chen4

Yanli An5

Chunmei Hu1

1 Department of Tuberculosis, the Second Hospital of Nanjing, Affiliated to Nanjing University of Chinese Medicine, Nanjing, China; 2 Central Hospital of Guangdong nongken, Zhanjiang, China; 3 Medical School of Southeast University, Nanjing, China; 4 Department of Clinical Research Center, The Second Hospital of Nanjing, Nanjing University of Chinese Medicine, Nanjing, China; 5 Jiangsu Key Laboratory of Molecular and Functional Imaging, Department of Radiology, Zhongda Hospital, Medical School of Southeast University, 87 Dingjiaqiao Road, Nanjing, China.

Jiayan Huang1*
Han Li2*
*These authors contributed equally to this work

Correspondence: Chunmei Hu, Zhongfu Road 1-1, Yijiangmen Street, Nanjing, Jiangsu Province, 210009.

Email njyy003@njucm.edu.cn

**Table S1** Primer sequences of each gene

| Gene | Primer Sequence, 5’–3’ | |
| --- | --- | --- |
| Forward | Reverse |
| OPN  Runx2  COL1A1  GAPDH  VEGF  ANG-1  HIF-1α | CGATGATGACGACGACGATGAC  TCGTCAGCGTCCTATCAGTTCC  CGAGTATGGAAGCGAAGGTT  ACAACTTTGGTATCGTGGAAGG  AGGGCAGAATCATCACGAAGT  AGCGCCGAAGTCCAGAAAAC  GAACGTCGAAAAGAAAAGTCTCG | CTTGTGTGCTGGCAGTGAAGG  CTTCCATCAGCGTCAACACCATC  CTTGAGGTTGCCAGTCTGTT  GCCATCACGCCACAGTTTC  AGGGTCTCGATTGGATGGCA  TACTCTCACGACAGTTGCCAT  CCTTATCAAGATGCGAACTCACA |

**
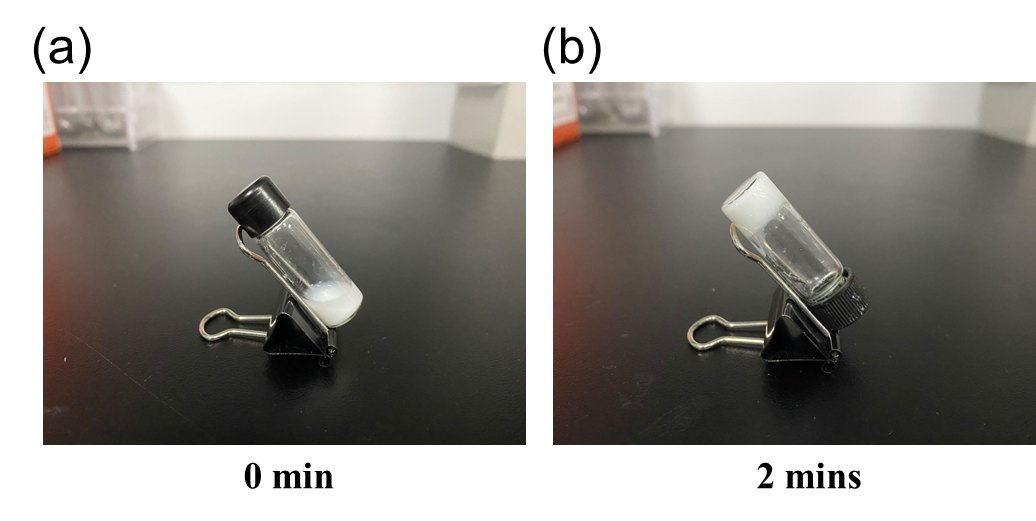
**

**Figure S1.** Inversion test of the hydrogels at different time points. (a) OHA3/CMCS3/HAP8 mixture solution. (b) OHA3/CMCS3/HAP8 hydrogel.


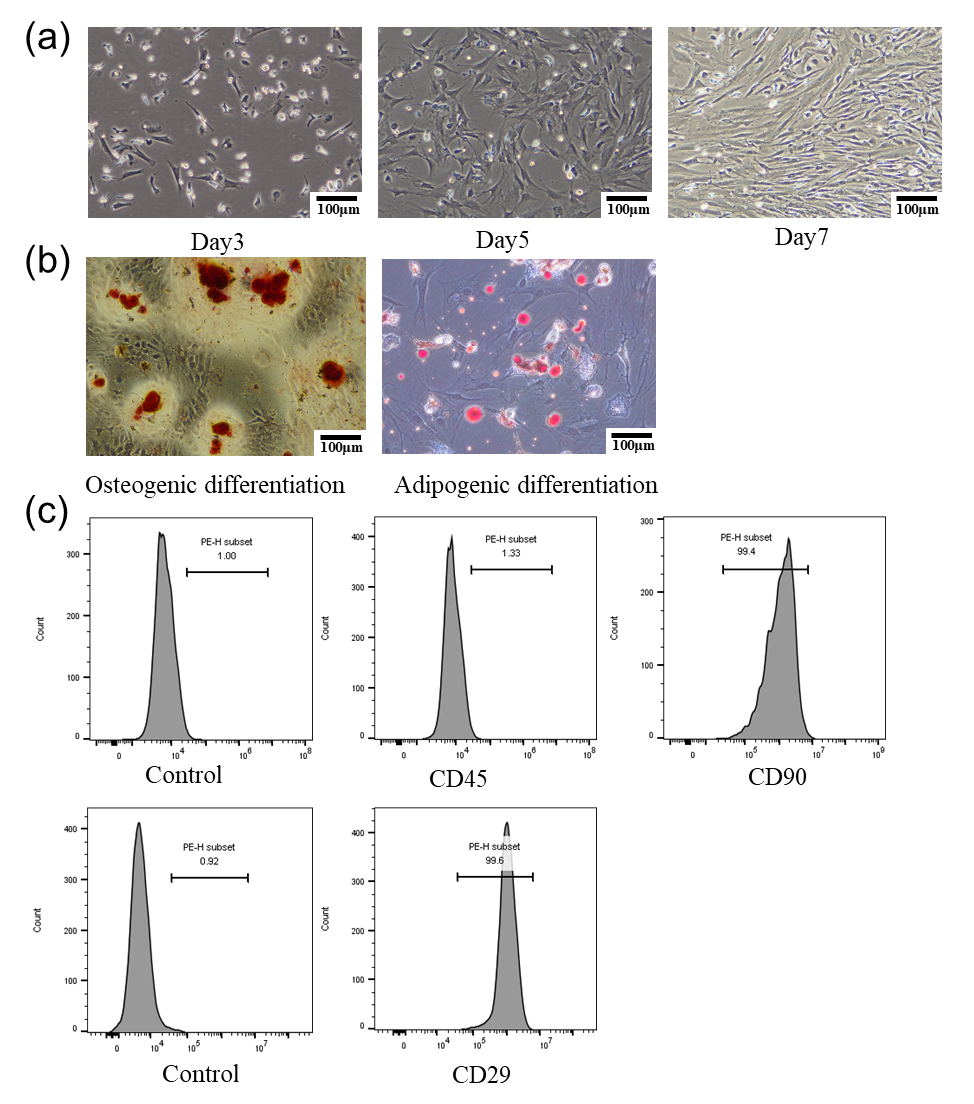


**Figure S2.** Identification of rBMSCs. (a) The morphology of BMSCs at 3days, 5days, 7days. (b) Adipogenic and osteogenic differentiation of rBMSCs. Osteogenic differentiation was shown by the left image. Adipogenic differentiation was shown by the right image. (c) The markers of rBMSCs were identified by flow cytometry.


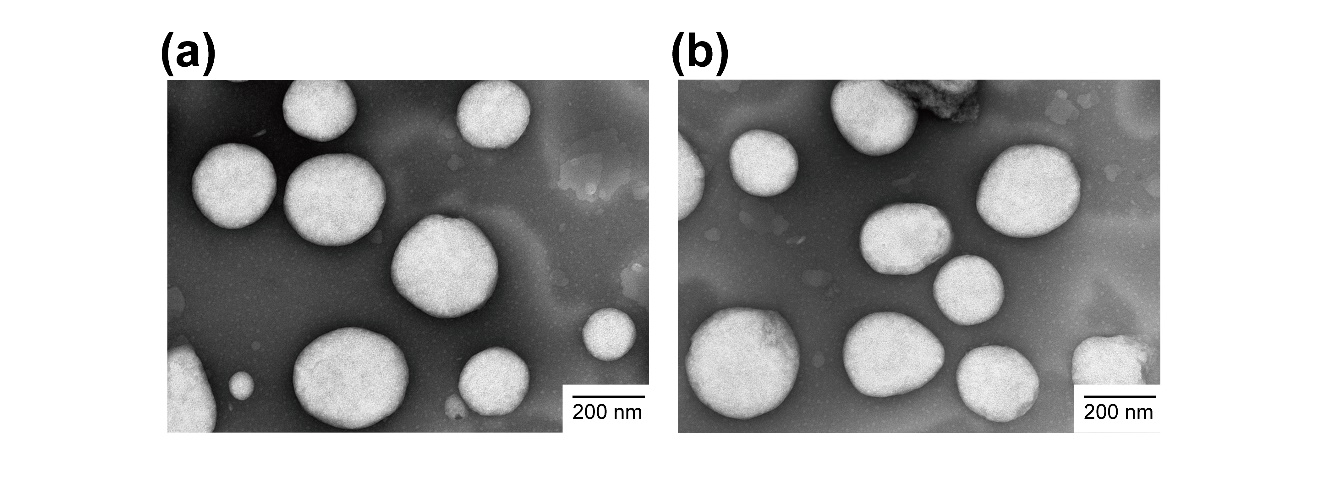


**Figure S3** TEM images of liposomes. (a) INH-loaded liposomes; (b) PZA- loaded liposomes.

**Table S2** AST and CK levels in serum of rat in each group

| Project | Group | Time/Testing results | | | | | Reference ranges |
| --- | --- | --- | --- | --- | --- | --- | --- |
|  |  | 1w | 2w | | 4w | |  |
| AST (U/L) | Control | 108.54±15.09 | | | | | 41.47~195.65 |
| Gel | 160.93±20.82 | | 190.56±7.65 | | 133.07±30.47 |
| RFP/INH/PZA-Lipo Exoeng Gel | 132.97±25.78 | | 125.23±44.29 | | 117.25±54.26 |
|  | | | | | | | |
| Cr  () | Control | 31.248±2.05 | | | | | 10.90~118.07 |
| Gel | 30.06±0.51 | | 36.37±2.99 | | 36.05±3.69 |
| RFP/INH/PZA-Lipo Exoeng Gel | 33.09±0.69 | | 34.49±2.35 | | 39.74±4.58 |
